# Supplementary material for: Carotenoid metabolite and transcriptome dynamics underlying flower color in marigold (Tagetes erecta L.)
Source: PubMed Central journal article supplement (PMC7544827; doi:10.1038/s41598-020-73859-7), 2020-10-08
Supplement: 41598_2020_73859_MOESM2_ESM.pdf [file 41598_2020_73859_MOESM2_ESM.pdf]

## SUPPLEMENTARY INFO

### **Carotenoid metabolite and transcriptome dynamics underlying flower color in marigold (*Tagetes erecta* L.)**

**Running head:** Color formation in marigold flowers

Huali Zhang<sup>1#</sup>, Shiya Zhang<sup>2#</sup>, Hua Zhang<sup>1</sup>, Xi Chen<sup>3</sup>, Fang Liang<sup>1</sup>, Helan Qin<sup>1</sup>, Yue Zhang<sup>1</sup>, Richen Cong<sup>1</sup>, Haibo Xin<sup>1\*</sup> and Zhao Zhang<sup>2\*</sup>

#### **Authors Affiliations:**

<sup>1</sup>Beijing Key Laboratory of Greening Plants Breeding, Beijing Institute of Landscape Architecture, Beijing, China

<sup>2</sup>Beijing Key Laboratory of Development and Quality Control of Ornamental Crops, Department of Ornamental Horticulture, China Agricultural University, Beijing, China

<sup>3</sup>Jiangsu Vocational College of Agriculture and Forestry, Nanjing, China

<sup>#</sup>These authors contributed equally

#### **\* Authors for correspondence:**

Haibo Xin, Beijing Institute of Landscape Architecture, Beijing 100102, China. e-mail: zghzpx@163.com

Zhao Zhang, Department of Ornamental Horticulture, China Agricultural University, Yuanmingyuan Xilu 2, Beijing 100193, China. Tel. 0086-10-62733603, e-mail: zhangzhao@cau.edu.cn

## **SUPPLEMENTARY DATA**

**Supplemental Figure S1.** Expression patterns of genes encoding enzymes putatively involved in the early 2C-methyl-D-erythritol 4-phosphate (MEP) pathway. Gene expression levels in the four flower developmental stages in both marigold 'V-01' and 'V-01M' are represented by heat maps. DXS, 1-Deoxy-D-xylulose 5-phosphate synthase; DXR, 1-Deoxy-D-xylulose 5-phosphate reductoisomerase; MCT, 2-C-Methyl-D-erythritol 4-phosphate cytidylyltransferase; CMK, 4-(Cytidine 50-diphospho)-2-C-methyl-D-erythritol kinase; MDS, 2-C-Methyl-D-erythritol 2,4-cyclodiphosphate synthase; HDS, 4-Hydroxy-3-methylbut-2-enyl diphosphate synthase; HDR, 4-Hydroxy-3-methylbut-2-enyl diphosphate reductase; GGPS, Geranylgeranyl diphosphate synthase.

**Supplementary Table S1.** Quality analysis of all reads from 24 samples.

**Supplementary Table S2.** Number of DEGs from all comparisons
